# Supplementary material for: A Well-Kept Treasure at Depth: Precious Red Coral Rediscovered in Atlantic Deep Coral Gardens (SW Portugal) after 300 Years
Source: PubMed Central journal article supplement (PMC4730840; doi:10.1371/journal.pone.0147228), 2016-01-22
Supplement: pone.0147228.s001.pdf [file pone.0147228.s001.pdf]

# Supporting Information

## A well-kept treasure at depth: Precious red coral rediscovered in Atlantic deep coral gardens (SW Portugal) after 300 years

Joana Boavida, Diogo Paulo, Didier Aurelle, Sophie Arnaud-Haond, Christian Marschal, John Reed, Jorge MS Gonçalves, Ester A Serrão

### S1 Table. Taxa observed in the Atlantic red coral (*Corallium rubrum*) benthic assemblage.

| Species or Taxa                                                             | Group       |
|-----------------------------------------------------------------------------|-------------|
| <b>Characteristic species of Atlantic red coral communities (Reefs 1-3)</b> |             |
| <i>Corallium rubrum</i> (Linnaeus, 1758)                                    | Anthozoa    |
| <i>Dendrophyllia cornigera</i> (Lamarck, 1816)                              | Anthozoa    |
| <i>Reteporella</i> cf. <i>grimaldii</i> (Julien, 1903)                      | Bryozoa     |
| <b>Accompanying species</b>                                                 |             |
| <i>Axinella</i> sp. (Schmidt, 1862)                                         | Porifera    |
| Axinellidae (Carter, 1875)                                                  | Porifera    |
| cf. <i>Geodia</i> sp. (Bowerbank, 1858)                                     | Porifera    |
| cf. <i>Pachastrella monilifera</i> (Schmidt, 1868)                          | Porifera    |
| cf. <i>Poecillastra compressa</i> (Bowerbank, 1866)                         | Porifera    |
| cf. <i>Tedania</i> ( <i>Tedania</i> ) <i>urgorri</i> (Cristobo, 2002)       | Porifera    |
| cf. <i>Tethya</i> sp. (Lamarck, 1815)                                       | Porifera    |
| Demospongiae (Sollas, 1885) 1                                               | Porifera    |
| Demospongiae (Sollas, 1885) 2                                               | Porifera    |
| Demospongiae (Sollas, 1885) 3                                               | Porifera    |
| Demospongiae (Sollas, 1885) 4                                               | Porifera    |
| Demospongiae (Sollas, 1885) 5                                               | Porifera    |
| Demospongiae (Sollas, 1885) 6                                               | Porifera    |
| Demospongiae (Sollas, 1885) 7                                               | Porifera    |
| <i>Desmacidon fruticosum</i> (Montagu, 1814)                                | Porifera    |
| <i>Phakellia robusta</i> (Bowerbank, 1866)                                  | Porifera    |
| <i>Phakellia ventilabrum</i> (Linnaeus, 1767)                               | Porifera    |
| <i>Stylocordyla</i> cf. <i>pellita</i> (Topsent, 1904)                      | Porifera    |
| Hydrozoa (Owen, 1843)                                                       | Hydrozoa    |
| <i>Halecium halecinum</i> (Linnaeus, 1758)                                  | Hydrozoa    |
| Aglaopheniidae (Marktanner-Turneretscher, 1890)                             | Hydrozoa    |
| <i>Alcyonium glomeratum</i> (Hassal, 1843)                                  | Anthozoa    |
| <i>Alcyonium</i> sp. (Linnaeus, 1758)                                       | Anthozoa    |
| <i>Dendrophyllia ramea</i> (Linnaeus, 1758)                                 | Anthozoa    |
| <i>Eunicella</i> sp. (Verrill, 1869)                                        | Anthozoa    |
| <i>Eunicella verrucosa</i> (Pallas, 1766)                                   | Anthozoa    |
| <i>Paramuricea clavata</i> (Risso, 1826)                                    | Anthozoa    |
| <i>Parazoanthus axinellae</i> (Schmidt, 1862)                               | Anthozoa    |
| <i>Sabella</i> sp. (Linnaeus, 1767)                                         | Polychaeta  |
| <i>Sabella spallanzanii</i> (Gmelin, 1791)                                  | Polychaeta  |
| Serpulidae (Rafinesque, 1815)                                               | Polychaeta  |
| <i>Palinurus elephas</i> (Fabricius, 1787)                                  | Crustacea   |
| <i>Neopycnodonte cochlear</i> (Poli, 1795)                                  | Bivalvia    |
| Brachiopoda (Duméril, 1805)                                                 | Brachiopoda |

|                                                                  |               |
|------------------------------------------------------------------|---------------|
| <i>Myriapora truncata</i> (Pallas, 1766)                         | Bryozoa       |
| <i>Astrospartus mediterraneus</i> (Risso, 1826)                  | Echinodermata |
| <i>Centrostephanus longispinus</i> (Philippi, 1845)              | Echinodermata |
| <i>Echinaster (Echinaster) sepositus</i> (Retzius, 1783)         | Echinodermata |
| <i>Holothuria (Panningothuria) forskali</i> (Delle Chiaje, 1823) | Echinodermata |
| <i>Holothuria</i> sp. (Linnaeus, 1767)                           | Echinodermata |
| <i>Marthasterias glacialis</i> (Linnaeus, 1758)                  | Echinodermata |
| Ascidiacea (Nielsen, 1995)                                       | Tunicata      |
| <i>Halocynthia papillosa</i> (Linnaeus, 1767)                    | Tunicata      |
| <i>Acantholabrus palloni</i> (Risso, 1810)                       | Pisces        |
| <i>Anthias anthias</i> (Linnaeus, 1758)                          | Pisces        |
| Actinopteri                                                      | Pisces        |
| <i>Scorpaena</i> sp. (Linnaeus, 1758)                            | Pisces        |
| <i>Serranus cabrilla</i> (Linnaeus, 1758)                        | Pisces        |
| <i>Trisopterus luscus</i> (Linnaeus, 1758)                       | Pisces        |
| <b>Co-occurring species</b>                                      |               |
| <i>Alcyonium palmatum</i> (Pallas, 1766)                         | Anthozoa      |
| cf. <i>Alcyoniina</i>                                            | Anthozoa      |
| cf. <i>Veretillum cynomorium</i> (Pallas, 1766)                  | Anthozoa      |
| <i>Ellisella paraplexauroides</i> Stiasny, 1936                  | Anthozoa      |
| <i>Eunicella filiformis</i> (Studer, 1879)                       | Anthozoa      |
| Octocorallia (Haeckel, 1866)                                     | Anthozoa      |
| <i>Bonellia viridis</i> (Rolando, 1821)                          | Echiura       |
| Clupeidae (Cuvier, 1817)                                         | Pisces        |
| <i>Diplodus vulgaris</i> (Geoffroy Saint-Hilaire, 1817)          | Pisces        |
| <b>Characteristic species of gold coral communities (Reef 4)</b> |               |
| <i>Savalia savaglia</i> (Bertoloni, 1819)                        | Anthozoa      |
| cf. <i>Geodia barretti</i> (Bowerbank, 1858)                     | Porifera      |
| <i>Pawsonia saxicola</i> (Brady & Robertson, 1871)               | Echinodermata |
