# Supplementary material for: A Well-Kept Treasure at Depth: Precious Red Coral Rediscovered in Atlantic Deep Coral Gardens (SW Portugal) after 300 Years
Source: PubMed Central journal article supplement (PMC4730840; doi:10.1371/journal.pone.0147228), 2016-01-22

# Supporting Information

**A well-kept treasure at depth: Precious red coral rediscovered in Atlantic deep coral gardens (SW Portugal) after 300 years**

**Joana Boavida, Diogo Paulo, Didier Aurelle, Sophie Arnaud-Haond, Christian Marschal, John Reed, Jorge MS Gonçalves, Ester A Serrão**

**S1 Fig. Temperature and conductivity profiles.** Kindly provided by Project Baseline during the Global Underwater Expedition 2014 (<http://projectbaseline.org>; <http://globalsubdive.com/expeditions>).

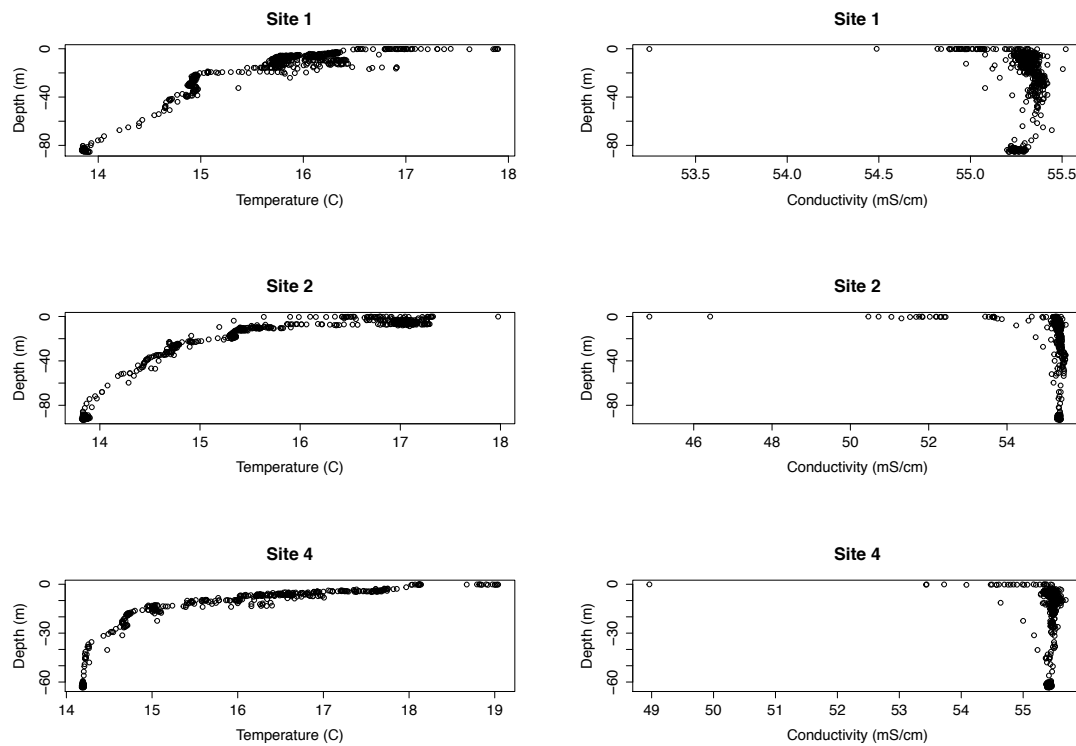

Supplement: pone.0147228.s002.pdf [file pone.0147228.s002.pdf]
